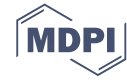

Review

# Why acute infections by human papillomaviruses matter

Samuel Alizon<sup>1,\*</sup> , Carmen Lía Murall<sup>1</sup>  and Ignacio G. Bravo<sup>1</sup> 

<sup>1</sup> MIVEGEC (UMR CNRS 5290, UR IRD 224, UM), 911 avenue Agropolis, 34394 Montpellier Cedex 5, France

\* Correspondence: samuel.alizon@cnrs.fr; Tel.: +33.4.48.19.18.67

Academic Editor: Alison McBride and Karl Munger

Version July 8, 2017 submitted to *Viruses*

**Abstract:** Most infections by human papillomaviruses (HPVs) are non-persistent. Yet, for HPVs, as for many other oncoviruses, there is a striking gap between our detailed understanding of chronic infections and our limited data on the early stages of infection. Here we argue that studying the biology of acute infections by HPVs is necessary and timely. Disentangling early interactions will help explain why certain infections become chronic or latent. A better description of immune effectors and pro-inflammatory pathways during the initial stages of infections has the potential to lead to novel treatments. Furthermore, cervical cancer screening and vaccines impose novel iatrogenic pressures on HPVs, implying that anticipating any evolutionary responses remain essential. Finally, hints at the associations between their acute infections and fertility deserve further investigation given their prevalence worldwide. Overall, understanding asymptomatic and benign infections may be instrumental in reducing HPV virulence.

**Keywords:** clearance; persistence; latency; fertility; virome; warts; cancer; evolution; immunotherapies; vaccination

---

The most oncogenic viruses to humans are a group of Human papillomaviruses (HPVs) [1]. HPV-induced cancers typically occur after several years of infection (Figure 1). The importance of viral persistence in the natural history of these diseases has driven most of the research to focus on chronic infections and to relatively neglect acute infections. We first present recent progress in the fight against HPVs before summarizing the current understanding about acute HPV infections. We then identify the main gaps in our knowledge about these infections, which, if filled, would have direct implications for preventing, controlling and treating infections by HPVs.

## State of the fight against HPVs

Infection-driven cancers stand out because they can be fought using the arsenal developed against infectious diseases: identification of risk factors, prevention of transmission and early detection of infected individuals. Identification of risk factors has led to the recognition of a few, closely related ‘high risk’ HPVs as necessary etiologic agents of several cancers [1]. Contagion can be prevented by the use of safe and effective vaccines targeting the most oncogenic HPVs along with certain ‘low risk’ HPVs causing anogenital warts [2,3]. Finally, screening programs for early detection of (pre)neoplastic lesions caused by HPV infections have been globally successful at decreasing the burden of cervical cancer [4].

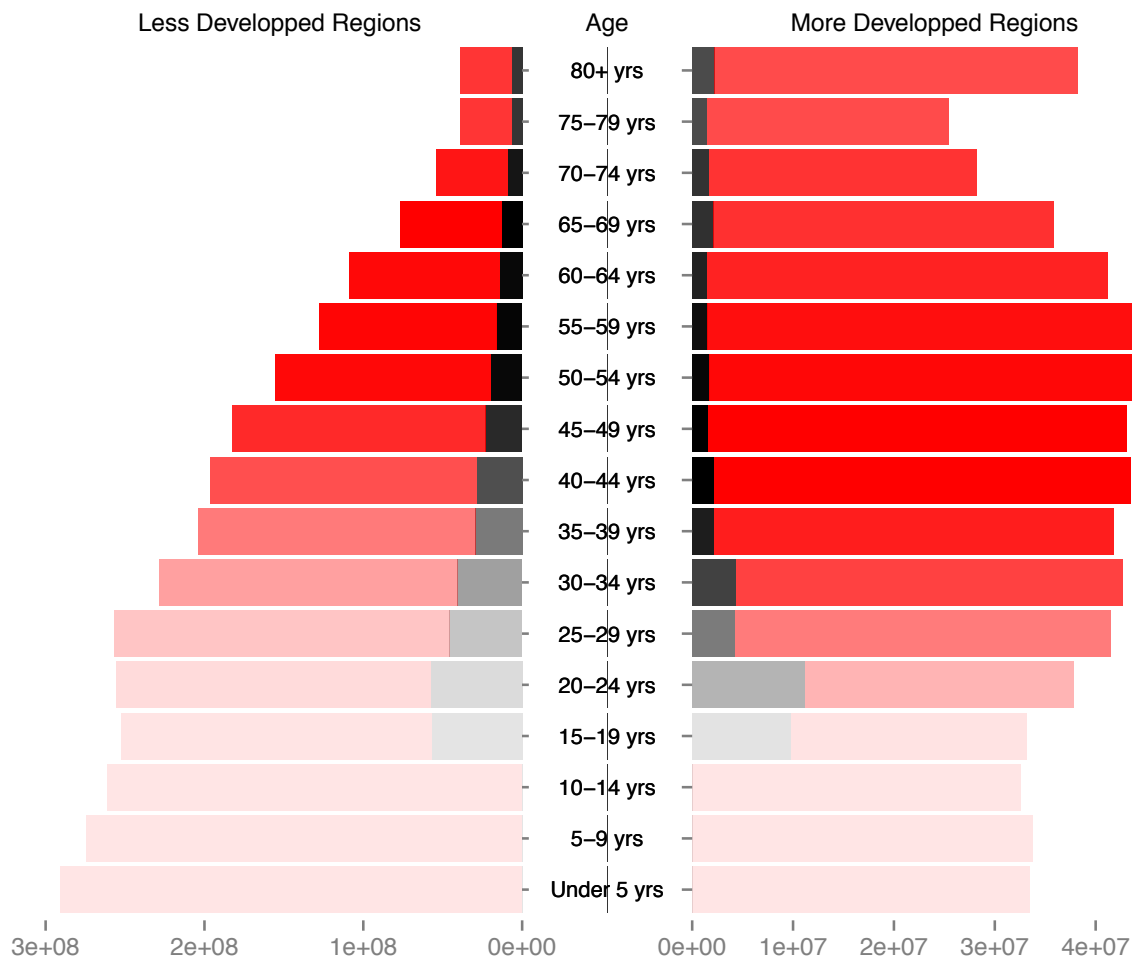

**Figure 1. Number of women with asymptomatic cervical HPV infections (black bars) as a function of age class (red bars) and of country development status.** Bar color intensity reflects the prevalence of cervical cancer in the corresponding age class (and hence the focus of current research). Data should be read as follows, using the 30-34 years of age as an example: in less developed regions, among the 228 million women in the age class, 40 million (17,8%) display a normal cytology but are actually infected by HPVs, and 30 thousand (0,013%) suffer from cervical cancer, while in more developed regions among the 42 million women in the age class, 4.3 million (10,2%) display a normal cytology but are actually infected by HPVs, and 6 thousand (0,015%) suffer from cervical cancer. Data correspond to HPV prevalence in women with normal cytology, as estimated in the HPV information center (<http://hpvcentre.net/>, [5]). Overall HPV prevalence values will be actually larger, as they will include women with abnormal cytology. No data were available for HPV prevalence in women below 15 years of age. Demographic data correspond to the UN projections for 2015 (note the shift in the logarithmic scale for the left and the right sides).

30 Unfortunately, HPVs will continue to infect millions of people in the foreseeable future, thereby  
31 causing significant morbidity and mortality worldwide [6]. Vaccine coverage varies widely both within  
32 and between countries [2], as does access to screening programs [7]. Beyond socio-economical factors,  
33 certain forms of cancer are more difficult to detect than others. This is the case for glandular forms  
34 of cervical cancer compared to the more common squamous carcinoma and recent trends show that  
35 the incidence and mortality of cervical adenocarcinoma are increasing [8]. Furthermore, decades of  
36 successful fundamental research have focused on cervical cancer, yet we still know too little about  
37 the implication of HPVs in anal [9], oropharyngeal [10] or even skin cancers [11], which are all on

38 the rise, albeit in different populations [1]. Finally, from an economical perspective, the total health  
39 care cost linked to treating genital warts should not be overlooked since it can exceed that of treating  
40 HPV-induced cancers [12], despite the obvious differences in severity and indirect impact of both  
41 diseases. It, therefore, remains vital to better understand the biology and epidemiology of HPV  
42 infections.

### 43 HPV acute infections

#### 44 *A definition challenge*

45 HPV infections that are not chronic have been referred to as ‘acute’, ‘non-persistent’, ‘incident’,  
46 ‘resolving’, ‘transient’, or ‘clearing’ infections. Here, following Virgin *et al.* [13], we define acute  
47 infections as a non-equilibrium process that results either in infection clearance, host death or chronic  
48 infection.

49 Establishment of chronic infections is a life history trait shared by very divergent viruses. For  
50 large viruses, such as herpesviruses, the infection often starts with an acute phase, but viral gene  
51 expression changes towards a different profile and the virus enters a latent state with limited or even  
52 no genome replication and no cellular damage, until a reactivation is triggered. In small viruses such  
53 as Torque-Teno viruses, the initial infection goes unnoticed (the acute infection stage has actually never  
54 been documented) and the viral genomes remain in the host and replicate chronically at very low  
55 levels [13].

56 In the case of HPVs the frontier between chronic and acute infections is somehow blurry because  
57 we lack knowledge about the immune and viral dynamics during the early stages of the infection and  
58 because HPVs are very diverse. For instance, some beta- and gammapapillomaviruses chronically  
59 infect stratified epithelia very early in the host’s life and replicate at very low levels without any  
60 apparent clinical or cellular damage. For others, including the oncogenic alphapapillomaviruses  
61 infecting mucosa, some symptomatic infections can resolve naturally but in a matter of years. To add  
62 complication, the viral gene expression program can be diverted towards a latency state directly upon  
63 infection, depending on the precise cell type or differentiation stage of the infected cell, as suggested  
64 by animal models [14–16]. Although within-host mathematical models are starting to  
65 investigate this question [17], epidemiological evidence is still lacking to assess the prevalence of these  
66 latent infections.

#### 67 *Most HPV infections are acute*

68 The acute, clinically prominent phases of viral infections, are generally better understood than  
69 the asymptomatic chronic ones [13]. Research on oncogenic HPVs is an exception because of its focus  
70 on chronicity and on virus-induced cell transformation.

71 It is currently thought that most infections by alphapapillomaviruses do not become chronic [4].  
72 For infections in the female genital tract, HPV16 is the most persistent type, but by 12 months 40%  
73 of the infections have already cleared or been treated because a (pre)neoplastic lesion was diagnosed  
74 (Figure 2). This proportion reaches 85% by 36 months [18]. For HPV6, which is rarely associated with  
75 cancer and often associated to genital warts, these numbers are 66% and 98% respectively. Note that the  
76 proportion of chronic infections directly depends on our ability to detect latent infection [14,16]. Also,  
77 for beta- and gammapapillomaviruses, chronic infections might be more prevalent but our knowledge  
78 is limited.

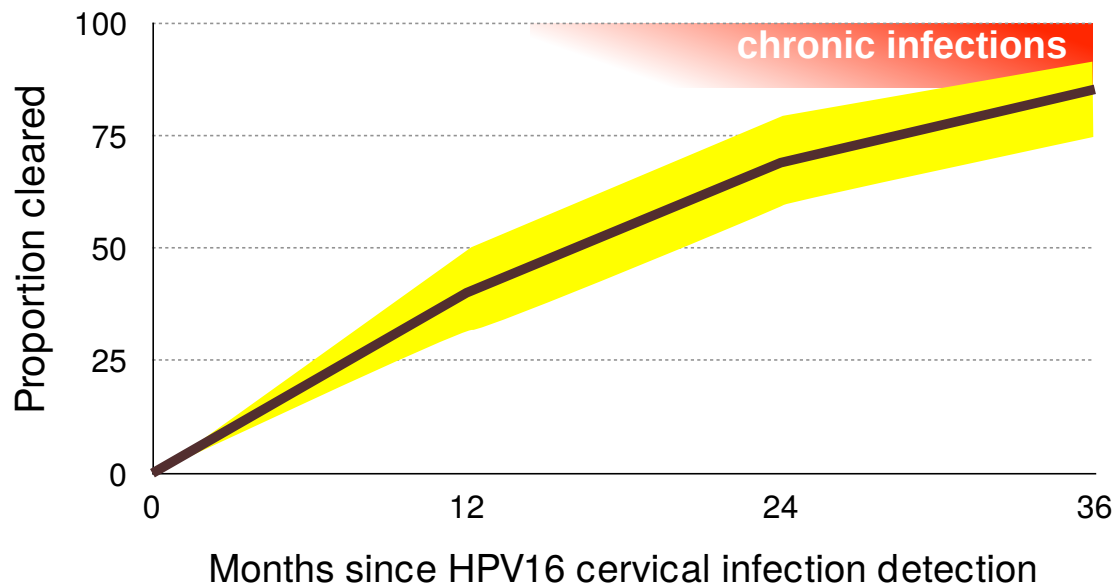

**Figure 2. Proportion of HPV16 infections cleared 12, 24 and 36 months after the first positive visit.** 95% confidence intervals are shown in yellow. Acute infections result in clearance or chronic infections, shown in red (note that chronic infections may clear as well). Data on clearance proportions originate from Table 4 in [18] and was obtained on 895 women aged 16 to 23 in the United States of America.

79 The placebo arms of vaccine trials have been instrumental in increasing our understanding of  
80 the epidemiology of these infections by following thousands of young adults over time [e.g. 19–21].  
81 The interest of these studies was to detect viral persistence of anogenital infections, and the typical  
82 interval between two visits was chosen around 6 months. In comparison, few studies have used denser  
83 sampling. In one of these [22], the sampling was extremely dense (twice per week) but this was at the  
84 expense of the duration of the follow-up (16 weeks) and of the accuracy of HPV detection (infections  
85 with low virion productivity might not be detected when using vaginal swabs). The results did show  
86 the importance of transient infections as well as the effect of the vaginal microbiota on HPV detection  
87 [23].

88 Two other studies sampled women every 3 months. One of these followed unvaccinated girls  
89 aged 15–16 years in Tanzania and found that the median time from reported sexual debut to first HPV  
90 infection was 5 months, while infection duration was 6 months [24]. Another study followed 150  
91 adolescent women (aged 14 to 17) visiting primary care clinics for a median of 6 years [25]. Their main  
92 results was that 21% of HPV type-specific infections consisted of re-detection after apparent clearance  
93 (2 negative visits). However, women were infected by many HPV types, which could interfere with  
94 the detection of one of the types. More generally, the population studied exhibited high rates of  
95 sexually transmitted infections (71.2% for chlamydia and 49.3% for gonorrhea) and a mean of 10.6  
96 sexual partners during the study. In spite of their limitations, these two studies suggest that the little  
97 we know about the duration and the actual clearance of acute infections could be challenged by studies  
98 with deeper resolution.

#### 99 *The immunology of clearance*

100 Why some anogenital infections persist and progress to cancer remains largely unresolved (Box 1).  
101 We know that HPV infections concur with a local anti-inflammatory environment, and that although  
102 the adaptive immune response is very efficient at clearing the infection, its activation is variable and

103 sometimes insufficient to prevent future re-infections [20,26,27]. Recent research into the role of innate  
104 effectors (e.g. natural killer T cells, NKT) and Th-17 responses (e.g.  $\delta\gamma$  T cells) in cancerous lesions has  
105 provided new insights for chronic infections [28], but the implications for acute infection clearance is  
106 not obvious.

107 Overall, we know that some cofactors such as HPV genotype, age of sexual debut, or coinfections,  
108 have an effect on clearance time [29]. However our mechanistic understanding is still lagging behind.  
109 In the next section, we show that understanding acute infections would have tangible public health  
110 implications.

#### Box 1: Open questions about HPV acute infections

- Do some innate immunity evasion mechanisms lead to delayed clearance? [28]
- How common is immunological tolerance to HPVs?
- What role, if any, do natural B-cell responses play in clearance?
- Are there type-specific differences in immunological clearance mechanisms? (i.e. are some mechanisms more effective against different HPV genotypes? or even across target cellular types, tissue structure or anatomical sites?)
- Are there long term effects after HPV infection clearance (immunological scarring)?
- How do HPV infections affect male and female fertility?
- How are do HPV infection kinetics affect transmission? [30]
- What is the role of the microbiota in HPV infection clearance, persistence and progression to cancer? [23,31]

#### 111 Open challenges

##### 112 *Host cells and chronification*

113 The mammalian skin is a complex environment with many different cell types, intricate  
114 tri-dimensional structure and strongly regulated cell differentiation programs. Not surprisingly,  
115 different epithelial cells are differentially targeted by different HPVs [32]. Cells in the hair follicle seem  
116 to act as a reservoir for chronic infection by cutaneous HPVs, while in stratified mucosal epithelia the  
117 viral infection can become chronic in the basal cell layer.

118 Many squamous cervical carcinomas associated to HPVs are now thought to arise from a discrete  
119 population of cuboidal epithelial cells located in the transformation zone between the endo- and  
120 ectocervix [33]. The absence of such transformation zones in the vagina, vulva or penis might explain  
121 why the cervix has a much higher burden of infection, higher incidence and younger age-at-diagnosis  
122 for cancers compared to other anatomical locations [32]. Cervical squamous and glandular cancers  
123 are associated with different HPVs and closely related viral variants, possibly also modulated by the  
124 host genetic background [34]. These complex interactions between viral genotype, host genotype,  
125 cellular phenotype and environment highlight the importance and the need to better understand the  
126 within-host ecology of the virus.

127 A related issue that continues to be debated is the role of latency in HPVs chronic infections.  
128 We know that some acute HPV infections originate from viral reactivation rather than from a new  
129 infection [14,16]. However, we still largely ignore how common this phenomenon could be. While  
130 certain herpesviruses are the paradigm of latency with their particular viral gene expression patterns,  
131 this does not seem to be the case for papillomavirus latent infections. Most of the evidence on  
132 latency in papillomaviruses originates from animal models, and latency is often defined as persistent  
133 infection in the absence of lesion [35,36]. Understood like this, latency might originate from the  
134 incomplete elimination of the virus during an acute infection. However, it has also been suggested  
135 that some infections could directly become latent, without going through an acute phase [16]. In  
136 addition to molecular virology investigations into latency mechanisms, studies that combine a detailed  
137 initial follow-up (to demonstrate clearance), a long follow-up (to demonstrate chronic infection) and

138 sequencing (to demonstrate that the virus causing the acute infection persisted) will provide us with a  
139 definitive answer regarding latency. HPVs could prove to be a particularly promising model to better  
140 understand why some infections may become chronic in general [13].

#### 141 *Immunotherapies*

142 Since vaccination will not be widespread for many years [37], the development of treatments  
143 remains urgent. Understanding the mechanisms of HPV clearance could lead to novel applications.  
144 The most promising are the development of immunotherapies, which consist in treating a disease by  
145 stimulating or suppressing the immune system.

146 Currently, the bulk of clinical and animal models research into HPV immunotherapies is,  
147 understandably, focused on cervical cancer treatment [38]. One of the most successful examples  
148 to date is that of the therapeutic vaccine VGX-3100, a plasmid containing synthetic versions of *E6*  
149 and *E7* genes of HPV16 and HPV18, which showed efficiency in a controlled trial at improving the  
150 regression of high-grade lesions (CIN2/3) [39]. The iatrogenic exposure to viral oncoproteins triggers  
151 a strong cellular immune response against the infected cells that the natural infection is not able to  
152 initiate. An alternative approach is to reverse the anti-inflammatory microenvironment that the virus  
153 creates during infections, in order to alert the immune system and boost its functioning [reviewed in  
154 40].

155 Practically, immunotherapies cannot be envisaged to treat all acute infections given their  
156 prevalence. However, knowledge on the acute stage of the infections could be transferable to fight  
157 the chronic stage. Furthermore, there could be more focused applications, for instance in the case of  
158 respiratory recurrent papillomatosis, a rare chronic condition that imposes a recurrent burden to the  
159 patients to control the benign clinical presentations of the disease, which can progress fatally to the  
160 lungs [41].

#### 161 *Fertility*

162 The Zika epidemic has reminded us of the risk viral infections have on pregnancies [42].  
163 Anogenital infections by HPVs deserve to be studied in this context because rare deleterious effects  
164 could translate into an important burden, given their high prevalence. There is a well-established  
165 link between cervical disease and pregnancy complications [43], but we are only beginning to  
166 understand the connection between clinically asymptomatic HPVs infections and complications  
167 such as pre-eclampsia, fetal growth restriction or pre-term delivery [44]. Asymptomatic cervical viral  
168 infections can also reduce barrier integrity [45] and viral DNA can be detected in the placenta [46].

169 In men, anogenital asymptomatic infections by mucosal and cutaneous HPVs are very common  
170 [21] and some are associated with penile cancer [1]. Surprisingly, HPV DNA can also be found in  
171 human semen [47] and although this viral DNA could originate from desquamating cells, data suggest  
172 the presence of HPVs DNA directly associated to sperm cells [48]. Evidence supporting a correlation  
173 between infection by HPVs in men and infertility is still controversial [49] and the exact mechanisms  
174 remain largely unknown [50].

175 Finally, *in utero* transmission of HPVs is rare [51] but there is a sound body of evidence describing  
176 transmission of HPVs during vaginal birth, as illustrated by the case of infantile respiratory recurrent  
177 papillomatosis caused by HPV6 or HPV11 [41].

178 Overall, the presence of mucosal HPVs in placenta and semen suggests non-classical tropisms,  
179 and viral life cycles in these particular cellular environments need to be elucidated. Clinical studies  
180 investigating acute anogenital infections in pregnant women (along the various stages of pregnancy) as  
181 well as in their partners are required to unravel how HPVs (independently of their oncogenic potential)  
182 may be either directly or indirectly increasing the risk of infertility, spontaneous abortions, pre-term  
183 labor, preeclampsia or other complications.

184 *Vaccine escape*

185 Effective vaccines with high coverage rates exert major selective pressures on pathogens [52].  
186 The risk of an evolutionary response from the pathogen relies on its genetic diversity, and does not  
187 necessarily require *de novo* mutations if it is already diverse. Extant diversity in papillomaviruses is  
188 immense, with hundreds of viral lineages, which themselves harbor significant genetic variation [53].

189 While vaccines against HPVs are effective and safe, they may be leaving the door open for an  
190 evolutionary response [54]. This can occur if some vaccinated individuals are infected by HPV vaccine  
191 types (due to infection before vaccination, immunosuppression or failure to mount a sufficiently strong  
192 immune response). In the clinical trial for the nonavalent vaccine, the median number of infections by  
193 one of the targeted viruses was 3.6 for 1,000 person-years at risk (data from Table S5 in [55]). If millions  
194 are vaccinated, this represents thousands of infections that would be eventually cleared and not result  
195 in malignant disease. Nevertheless, such acute infections may last long enough to allow specific viral  
196 lineages (either pre-existing or *de novo* generated viral variants) to be differentially transmitted, thus  
197 paving the way for viral adaptation to this special environment. HPV vaccines can also generate  
198 off-target activity and offer protection against closely related viruses not targeted by the vaccine  
199 formulation [56,57]. Yet viral diversity remains so large that in the few regions where vaccination  
200 has reduced the prevalence of vaccine-targeted types, most other HPVs continue to circulate [2,58].  
201 Overall, vaccination against HPVs will undoubtedly have a strong and highly desirable impact in  
202 disease prevention, but it will create novel host environments to which the viruses may adapt.

203 Evaluating the potential for HPV evolution, requires genomic data of intra- and inter-individual  
204 viral populations collected through time. Since HPVs are double-stranded DNA viruses replicated  
205 by host polymerases, mutation rates are expected to be low. Nevertheless, we know little about  
206 polymerase fidelity in somatic cells, both in general and during a viral infections. Investigation of  
207 long follow-up data sets with short sampling intervals are lacking, especially since evolutionary  
208 rates may exhibit periods of rapid increase followed by long periods of stasis, as demonstrated for  
209 Influenza A virus [59]. Further, in the case of HPVs, displaying acute, chronic and latent stages of  
210 the infection, the evolutionary dynamics may strongly depend on the presence of a latent phase and  
211 on the epidemiological transmission patterns, as described for Varicella-zoster virus [60]. For HPVs,  
212 focusing on the acute infection could therefore yield novel insights since this is where the viral life  
213 cycle is most productive.

214 *Scars that matter long after clearance?*

215 Even when viral clearance does occur, recent work shows that acute infections can impair the  
216 immune system causing chronic inflammation or ‘immunological scarring’ [61]. Certain oncoviruses  
217 are believed to leave behind damage in their host cells, which can lead to cancer several years later  
218 [62]. For instance, acute infections can induce modifications in the cellular (epi)genome, creating the  
219 stage for pre-cancerous lesions [62,63]. Although an old hypothesis, the ‘hit-and-run’ effects of acute  
220 infections are poorly understood for bacterial or viral infections, and exploring how HPVs may cause  
221 this kind of damage remains an important research direction [64].

222 Quite speculatively, such a long-term impact could concern anogenital but also infections at  
223 cutaneous sites. Indeed, virtually all humans become infected by very diverse cutaneous HPVs, chiefly  
224 beta- and gammapapillomaviruses, which can act as cofactors for the risk of developing non-melanoma  
225 skin cancers in certain human populations [11]. Since HPVs generally cause very prevalent, benign  
226 infections, and because HPVs interact extensively with the immune system, they could be an ideal  
227 model for studying ‘under-the-radar’ viral infections and their potential side-effects on immune  
228 functioning.

## 229 Conclusions

230 Better understanding acute infections by HPVs is urgent because of their enormous fundamental  
231 and public health implications (Figure 3). As with most infectious diseases, it is important to remain  
232 humble and to accept that eradication is unlikely. HPVs are so diverse that vaccines will likely never  
233 remove them from our virome. In fact, this might not be desirable since HPVs might be occupying  
234 a niche, which, if vacant, could be filled by more virulent pathogens. This is why the development  
235 of vaccines should not stop us from improving our characterization of HPVs and to shift from an  
236 eradication to control perspective.

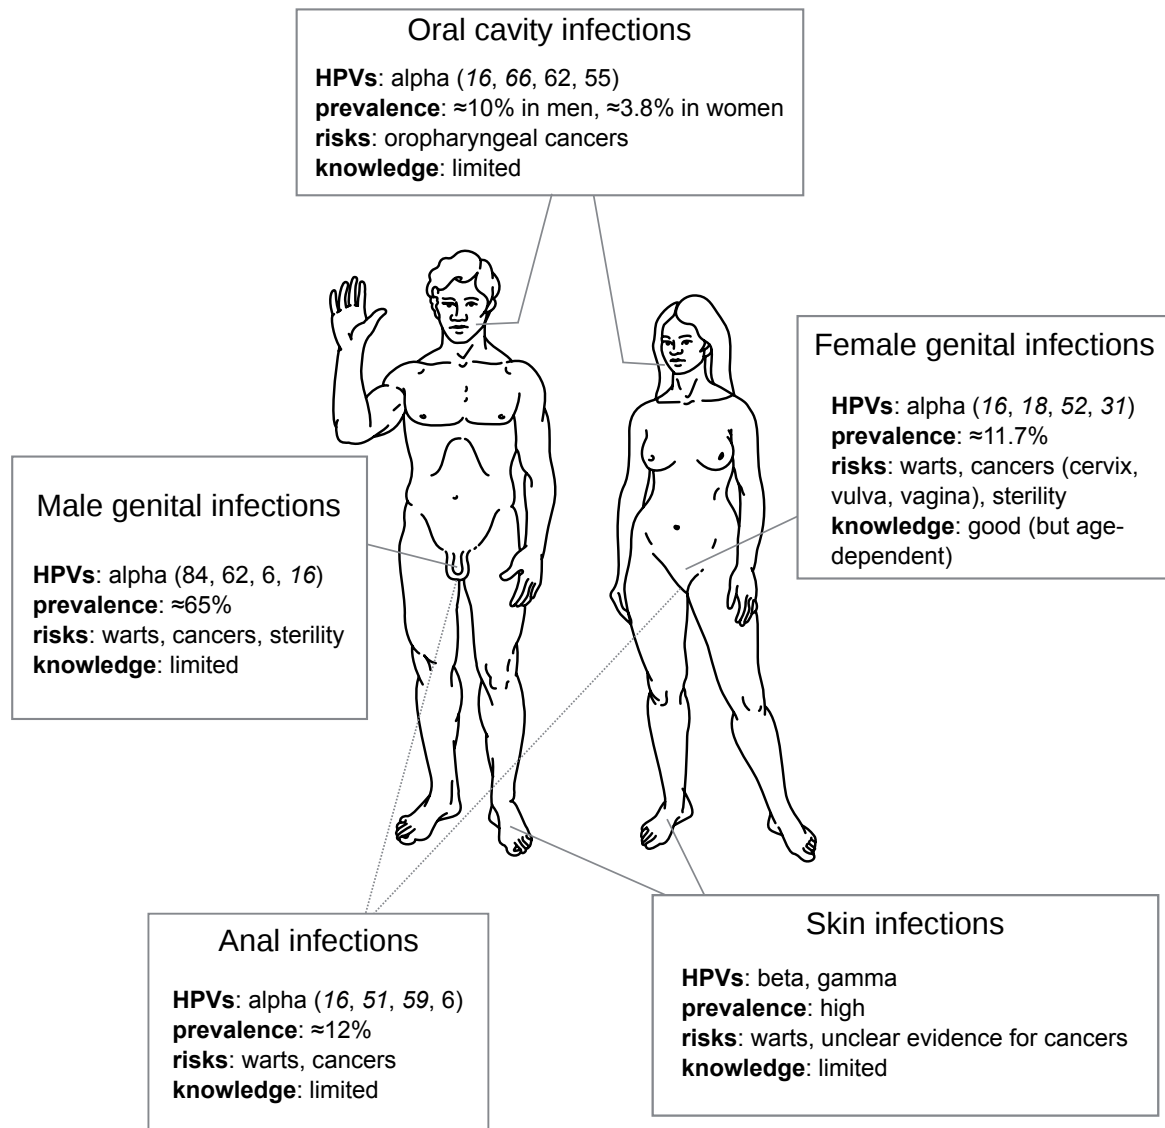

**Figure 3. Challenges of HPV acute infections per anatomical location.** For each location, HPV types are ordered per prevalence and high risk types are in italic.

237 **Acknowledgments:** SA is supported by the European Research Council (ERC) under the European Union's  
238 Horizon 2020 research and innovation program (EVOLPROOF, grant agreement No 648963). NB is supported  
239 by the European Research Council (ERC) under the European Union's Horizon 2020 research and innovation  
240 program (CODOVIREVOL, grant agreement No 647916). All authors acknowledge further support from the CNRS  
241 and the IRD.

242 **Author Contributions:** All authors conceived and wrote the review.



243 **Conflicts of Interest:** The authors declare no conflict of interest. The funding sponsors had no role in the writing  
244 of the manuscript, and in the decision to publish it.

## 245 Abbreviations

246 The following abbreviations are used in this manuscript:

247 HPV<sub>s</sub> Human Papillomaviruses  
248 LR Low Risk  
HR High Risk

## 249 References

- 250 1. Plummer, M.; de Martel, C.; Vignat, J.; Ferlay, J.; Bray, F.; Franceschi, S. Global burden of cancers attributable  
251 to infections in 2012: a synthetic analysis. *Lancet Glob Health* **2016**, *4*, e609–e616.
- 252 2. Drolet, M.; Bénard, É.; Boily, M.C.; Ali, H.; Baandrup, L.; Bauer, H.; Beddows, S.; Brisson, J.; Brotherton,  
253 J.M.L.; Cummings, T.; Donovan, B.; Fairley, C.K.; Flagg, E.W.; Johnson, A.M.; Kahn, J.A.; Kavanagh,  
254 K.; Kjaer, S.K.; Kliewer, E.V.; Lemieux-Mellouki, P.; Markowitz, L.; Mboup, A.; Mesher, D.; Niccolai, L.;  
255 Oliphant, J.; Pollock, K.G.; Soldan, K.; Sonnenberg, P.; Tabrizi, S.N.; Tanton, C.; Brisson, M. Population-level  
256 impact and herd effects following human papillomavirus vaccination programmes: a systematic review  
257 and meta-analysis. *Lancet Infect Dis* **2015**, *15*, 565–80.
- 258 3. Herrero, R.; González, P.; Markowitz, L.E. Present status of human papillomavirus vaccine development  
259 and implementation. *Lancet Oncol* **2015**, *16*, e206–16.
- 260 4. Schiffman, M.; Solomon, D. Clinical practice. Cervical-cancer screening with human papillomavirus and  
261 cytologic cotesting. *N Engl J Med* **2013**, *369*, 2324–31.
- 262 5. Bruni, L.; Diaz, M.; Castellsagué, X.; Ferrer, E.; Bosch, F.X.; de Sanjosé, S. Cervical human papillomavirus  
263 prevalence in 5 continents: meta-analysis of 1 million women with normal cytological findings. *J Infect Dis*  
264 **2010**, *202*, 1789–99.
- 265 6. Bruni, L.; Diaz, M.; Barrionuevo-Rosas, L.; Herrero, R.; Bray, F.; Bosch, F.X.; de Sanjosé, S.; Castellsagué, X.  
266 Global estimates of human papillomavirus vaccination coverage by region and income level: a pooled  
267 analysis. *Lancet Glob Health* **2016**, *4*, e453–63.
- 268 7. Ronco, G.; Dillner, J.; Elfström, K.M.; Tunesi, S.; Snijders, P.J.F.; Arbyn, M.; Kitchener, H.; Segnan, N.;  
269 Gilham, C.; Giorgi-Rossi, P.; Berkhof, J.; Peto, J.; Meijer, C.J.L.M. Efficacy of HPV-based screening for  
270 prevention of invasive cervical cancer: follow-up of four European randomised controlled trials. *The Lancet*  
271 **2014**, *383*, 524–532.
- 272 8. Castanon, A.; Landy, R.; Sasieni, P.D. Is cervical screening preventing adenocarcinoma and adenosquamous  
273 carcinoma of the cervix? *International Journal of Cancer* **2016**, *139*, 1040–1045.
- 274 9. Bertisch, B.; Franceschi, S.; Lise, M.; Vernazza, P.; Keiser, O.; Schöni-Affolter, F.; Bouchardy, C.; Dehler, S.;  
275 Levi, F.; Jundt, G.; Ess, S.; Pawlita, M.; Kovari, H.; Wandeler, G.; Calmy, A.; Cavassini, M.; Stöckle, M.;  
276 Clifford, G. Risk Factors for Anal Cancer in Persons Infected With HIV: A Nested Case-Control Study in  
277 the Swiss HIV Cohort Study. *American Journal of Epidemiology* **2013**, *178*, 877–884.
- 278 10. Gillison, M.L.; Chaturvedi, A.K.; Anderson, W.F.; Fakhry, C. Epidemiology of Human  
279 Papillomavirus-Positive Head and Neck Squamous Cell Carcinoma. *J Clin Oncol* **2015**, *33*, 3235–42.
- 280 11. Quint, K.D.; Genders, R.E.; de Koning, M.N.; Borgogna, C.; Gariglio, M.; Bouwes Bavinck, J.N.; Doorbar,  
281 J.; Feltkamp, M.C. Human Beta-papillomavirus infection and keratinocyte carcinomas. *J Pathol* **2015**,  
282 *235*, 342–354.
- 283 12. Herse, F.; Reissell, E. The annual costs associated with human papillomavirus types 6, 11, 16, and 18  
284 infections in Finland. *Scand J Infect Dis* **2011**, *43*, 209–215.
- 285 13. Virgin, H.W.; Wherry, E.J.; Ahmed, R. Redefining chronic viral infection. *Cell* **2009**, *138*, 30–50.
- 286 14. Gravitt, P.E. The known unknowns of HPV natural history. *J Clin Invest* **2011**, *121*, 4593–4599.
- 287 15. Doorbar, J.; Quint, W.; Banks, L.; Bravo, I.G.; Stoler, M.; Broker, T.R.; Stanley, M.a. The biology and life-cycle  
288 of human papillomaviruses. *Vaccine* **2012**, *30 Suppl 5*, F55–70.
- 289 16. Doorbar, J. Latent papillomavirus infections and their regulation. *Curr Opin Virol* **2013**, *3*, 416–21.
- 290 17. Ryser, M.D.; Myers, E.R.; Durrett, R. HPV clearance and the neglected role of stochasticity. *PLoS Comput*  
291 *Biol* **2015**, *11*, e1004113.

- 292 18. Insinga, R.P.; Dasbach, E.J.; Elbasha, E.H.; Liaw, K.L.; Barr, E. Incidence and duration of cervical human  
293 papillomavirus 6, 11, 16, and 18 infections in young women: an evaluation from multiple analytic  
294 perspectives. *Cancer Epidemiol Biomarkers Prev* **2007**, *16*, 709–15.
- 295 19. Herrero, R.; Wacholder, S.; Rodríguez, A.C.; Solomon, D.; González, P.; Kreimer, A.R.; Porras, C.; Schussler,  
296 J.; Jiménez, S.; Sherman, M.E.; Quint, W.; Schiller, J.T.; Lowy, D.R.; Schiffman, M.; Hildesheim, A.; Costa  
297 Rica Vaccine Trial Group. Prevention of persistent human papillomavirus infection by an HPV16/18  
298 vaccine: a community-based randomized clinical trial in Guanacaste, Costa Rica. *Cancer Discov* **2011**,  
299 *1*, 408–19.
- 300 20. Castellsagué, X.; Naud, P.; Chow, S.N.; Wheeler, C.M.; Gernar, M.J.V.; Lehtinen, M.; Paavonen, J.;  
301 Jaisamrarn, U.; Garland, S.M.; Salmerón, J.; Apter, D.; Kitchener, H.; Teixeira, J.C.; Skinner, S.R.; Limson, G.;  
302 Szarewski, A.; Romanowski, B.; Aoki, F.Y.; Schwarz, T.F.; Poppe, W.A.J.; Bosch, F.X.; de Carvalho, N.S.;  
303 Peters, K.; Tjalma, W.A.A.; Safaeian, M.; Raillard, A.; Descamps, D.; Struyf, F.; Dubin, G.; Rosillon, D.;  
304 Baril, L. Risk of newly detected infections and cervical abnormalities in women seropositive for naturally  
305 acquired human papillomavirus type 16/18 antibodies: analysis of the control arm of PATRICIA. *J Infect*  
306 *Dis* **2014**, *210*, 517–34.
- 307 21. Moreira, E.D.; Giuliano, A.R.; Palefsky, J.; Flores, C.A.; Goldstone, S.; Ferris, D.; Hillman, R.J.; Moi, H.;  
308 Stoler, M.H.; Marshall, B.; Vuocolo, S.; Guris, D.; Haupt, R.M. Incidence, Clearance, and Disease Progression  
309 of Genital Human Papillomavirus Infection in Heterosexual Men. *J Infect Dis* **2014**, *210*, 192–199.
- 310 22. Liu, S.H.; Cummings, D.A.T.; Zenilman, J.M.; Gravitt, P.E.; Brotman, R.M. Characterizing the Temporal  
311 Dynamics of Human Papillomavirus DNA Detectability Using Short-Interval Sampling. *Cancer Epidemiol*  
312 *Biomarkers Prev* **2014**, *23*, 200–208.
- 313 23. Brotman, R.M.; Shardell, M.D.; Gajer, P.; Tracy, J.K.; Zenilman, J.M.; Ravel, J.; Gravitt, P.E. Interplay between  
314 the temporal dynamics of the vaginal microbiota and human papillomavirus detection. *J Infect Dis* **2014**,  
315 *210*, 1723–33.
- 316 24. Houlihan, C.F.; Baisley, K.; Bravo, I.G.; Kapiga, S.; de Sanjosé, S.; Changalucha, J.; Ross, D.A.; Hayes, R.J.;  
317 Watson-Jones, D. Rapid acquisition of HPV around the time of sexual debut in adolescent girls in Tanzania.  
318 *Int J Epidemiol* **2016**, pp. 1–12.
- 319 25. Shew, M.L.; Ermel, A.C.; Tong, Y.; Tu, W.; Qadadri, B.; Brown, D.R. Episodic detection of human  
320 papillomavirus within a longitudinal cohort of young women. *J Med Virol* **2015**, *87*, 2122–2129.
- 321 26. Stanley, M. Immune responses to human papillomavirus. *Vaccine* **2006**, *24 Suppl 1*, S16–22.
- 322 27. Stanley, M. Immunology of HPV Infection. *Curr Obstet Gynecol Rep* **2015**, *4*, 195–200.
- 323 28. Van Hede, D.; Langers, I.; Delvenne, P.; Jacobs, N. Origin and immunoescape of uterine cervical cancer.  
324 *Presse Med* **2014**, *43*, e413–e421.
- 325 29. Ferenczy, A.; Franco, E. Persistent human papillomavirus infection and cervical neoplasia. *Lancet Oncol*  
326 **2002**, *3*, 11–6.
- 327 30. Grabowski, M.K.; Kong, X.; Gray, R.H.; Serwadda, D.; Kigozi, G.; Gravitt, P.E.; Nalugoda, F.; Reynolds, S.J.;  
328 Wawer, M.J.; Redd, A.D.; Watya, S.; Quinn, T.C.; Tobian, A.A.R. Partner Human Papillomavirus Viral Load  
329 and Incident Human Papillomavirus Detection in Heterosexual Couples. *J Infect Dis* **2016**, *213*, 948–56.
- 330 31. Mitra, A.; MacIntyre, D.A.; Marchesi, J.R.; Lee, Y.S.; Bennett, P.R.; Kyrgiou, M. The vaginal microbiota,  
331 human papillomavirus infection and cervical intraepithelial neoplasia: what do we know and where are  
332 we going next? *Microbiome* **2016**, *4*, 58.
- 333 32. Nicolás-Párraga, S.; Gandini, C.; Pimenoff, V.N.; Alemany, L.; de Sanjosé, S.; Xavier Bosch, F.; Bravo, I.G.;  
334 the RIS HPV TT and HPV VVAP study groups. HPV16 variants distribution in invasive cancers of the  
335 cervix, vulva, vagina, penis, and anus. *Cancer Med* **2016**, *5*, 2909–2919.
- 336 33. Herfs, M.; Yamamoto, Y.; Laury, A.; Wang, X.; Nucci, M.R.; McLaughlin-Drubin, M.E.; Münger, K.; Feldman,  
337 S.; McKeon, F.D.; Xian, W.; Crum, C.P. A discrete population of squamocolumnar junction cells implicated  
338 in the pathogenesis of cervical cancer. *Proc Natl Acad Sci USA* **2012**, *109*, 10516–21.
- 339 34. Nicolás-Párraga, S.; Alemany, L.; de Sanjosé, S.; Bosch, F.; Bravo, I.; on behalf of the RIS HPV TT and HPV  
340 VVAP study groups. Differential HPV16 variant distribution in squamous cell carcinoma, adenocarcinoma  
341 and adenosquamous cell carcinoma. *Int J Cancer* **2017**, *140*, 2092–2100.
- 342 35. Maglennon, G.A.; McIntosh, P.; Doorbar, J. Persistence of viral DNA in the epithelial basal layer suggests a  
343 model for papillomavirus latency following immune regression. *Virology* **2011**, *414*, 153–163.

- 344 36. Maglennon, G.A.; McIntosh, P.B.; Doorbar, J. Immunosuppression Facilitates the Reactivation of Latent  
345 Papillomavirus Infections. *J Virol* **2014**, *88*, 710–716.
- 346 37. Bosch, F.X.; Robles, C.; Díaz, M.; Arbyn, M.; Baussano, I.; Clavel, C.; Ronco, G.; Dillner, J.; Lehtinen, M.;  
347 Petry, K.U.; Poljak, M.; Kjaer, S.K.; Meijer, C.J.L.M.; Garland, S.M.; Salmerón, J.; Castellsagué, X.; Bruni, L.;  
348 de Sanjosé, S.; Cuzick, J. HPV-FASTER: broadening the scope for prevention of HPV-related cancer. *Nat*  
349 *Rev Oncol* **2015**, *13*, 119–132.
- 350 38. Skeate, J.G.; Woodham, A.W.; Einstein, M.H.; Silva, D.M.D.; Kast, W.M. Current therapeutic vaccination  
351 and immunotherapy strategies for HPV-related diseases. *Hum Vaccin Immunother* **2016**, *12*, 1418–1429.
- 352 39. Trimble, C.L.; Morrow, M.P.; Kraynyak, K.A.; Shen, X.; Dallas, M.; Yan, J.; Edwards, L.; Parker, R.L.;  
353 Denny, L.; Giffear, M.; Brown, A.S.; Marcozzi-Pierce, K.; Shah, D.; Slager, A.M.; Sylvester, A.J.; Khan, A.;  
354 Broderick, K.E.; Juba, R.J.; Herring, T.A.; Boyer, J.; Lee, J.; Sardesai, N.Y.; Weiner, D.B.; Bagarazzi, M.L.  
355 Safety, efficacy, and immunogenicity of VGX-3100, a therapeutic synthetic DNA vaccine targeting human  
356 papillomavirus 16 and 18 E6 and E7 proteins for cervical intraepithelial neoplasia 2/3: a randomised,  
357 double-blind, placebo-controlled phase 2b trial. *Lancet* **2015**, *386*, 2078–2088.
- 358 40. Amador-Molina, A.; Hernández-Valencia, J.F.; Lamoyi, E.; Contreras-Paredes, A.; Lizano, M. Role of innate  
359 immunity against human papillomavirus (HPV) infections and effect of adjuvants in promoting specific  
360 immune response. *Viruses* **2013**, *5*, 2624–42.
- 361 41. Derkay, C.S.; Wiatrak, B. Recurrent Respiratory Papillomatosis: A Review. *Laryngoscope* **2008**,  
362 *118*, 1236–1247.
- 363 42. Silasi, M.; Cardenas, I.; Kwon, J.Y.; Racicot, K.; Aldo, P.; Mor, G. Viral Infections During Pregnancy. *Am J*  
364 *Reprod Immunol* **2015**, *73*, 199–213.
- 365 43. Kyrgiou, M.; Athanasiou, A.; Paraskevaidi, M.; Mitra, A.; Kalliala, I.; Martin-Hirsch, P.; Arbyn, M.; Bennett,  
366 P.; Paraskevaidis, E. Adverse obstetric outcomes after local treatment for cervical preinvasive and early  
367 invasive disease according to cone depth: systematic review and meta-analysis. *BMJ* **2016**, *354*, i3633.
- 368 44. Zuo, Z.; Goel, S.; Carter, J.E. Association of Cervical Cytology and HPV DNA Status During Pregnancy  
369 With Placental Abnormalities and Preterm Birth. *Am J Clin Pathol* **2011**, *136*, 260–265.
- 370 45. Racicot, K.; Cardenas, I.; Wünsche, V.; Aldo, P.; Guller, S.; Means, R.E.; Romero, R.; Mor, G. Viral Infection  
371 of the Pregnant Cervix Predisposes to Ascending Bacterial Infection. *J Immunol* **2013**, *191*, 934–941.
- 372 46. Slatter, T.L.; Hung, N.G.; Clow, W.M.; Royds, J.A.; Devenish, C.J.; Hung, N.A. A clinicopathological  
373 study of episomal papillomavirus infection of the human placenta and pregnancy complications. *Modern*  
374 *Pathology* **2015**, *28*, 1369–1382.
- 375 47. Laprise, C.; Trottier, H.; Monnier, P.; Coutlée, F.; Mayrand, M.H. Prevalence of human papillomaviruses in  
376 semen: a systematic review and meta-analysis. *Hum Reprod* **2014**, *29*, 640–651.
- 377 48. Depuydt, C.E.; Jonckheere, J.; Berth, M.; Salembier, G.M.; Vereecken, A.J.; Bogers, J.J. Serial type-specific  
378 human papillomavirus (HPV) load measurement allows differentiation between regressing cervical lesions  
379 and serial virion productive transient infections. *Cancer Med* **2015**, *4*, 1294–1302.
- 380 49. Luttmmer, R.; Dijkstra, M.G.; Snijders, P.J.F.; Hompes, P.G.A.; Pronk, D.T.M.; Hubeek, I.; Berkhof, J.;  
381 Heideman, D.A.M.; Meijer, C.J.L.M. Presence of human papillomavirus in semen in relation to semen  
382 quality. *Hum Reprod* **2016**, *31*, 280–286.
- 383 50. Foresta, C.; Noventa, M.; De Toni, L.; Gizzo, S.; Garolla, A. HPV-DNA sperm infection and infertility: from  
384 a systematic literature review to a possible clinical management proposal. *Andrology* **2015**, *3*, 163–73.
- 385 51. Castellsagué, X.; Drudis, T.; Cañadas, M.P.; Goncé, A.; Ros, R.; Pérez, J.M.; Quintana, M.J.; Muñoz, J.;  
386 Albero, G.; de Sanjosé, S.; Bosch, F.X. Human Papillomavirus (HPV) infection in pregnant women and  
387 mother-to-child transmission of genital HPV genotypes: a prospective study in Spain. *BMC Infect Dis* **2009**,  
388 *9*, 74.
- 389 52. Gandon, S.; Day, T. Evidences of parasite evolution after vaccination. *Vaccine* **2008**, *26S*, C4–7.
- 390 53. Bernard, H.U.; Burk, R.D.; Chen, Z.; van Doorslaer, K.; Hausen, H.z.; de Villiers, E.M. Classification of  
391 papillomaviruses (PVs) based on 189 PV types and proposal of taxonomic amendments. *Virology* **2010**,  
392 *401*, 70–79.
- 393 54. Murall, C.L.; Bauch, C.T.; Day, T. Could the human papillomavirus vaccines drive virulence evolution?  
394 *Proc Biol Sci* **2015**, *282*, 20141069.
- 395 55. Joura, E.A.; Giuliano, A.R.; Iversen, O.E.; Bouchard, C.; Mao, C.; Mehlsen, J.; Moreira, Jr, E.D.; Ngan,  
396 Y.; Petersen, L.K.; Lazcano-Ponce, E.; Pitisuttithum, P.; Restrepo, J.A.; Stuart, G.; Woelber, L.; Yang, Y.C.;

- 397 Cuzick, J.; Garland, S.M.; Huh, W.; Kjaer, S.K.; Bautista, O.M.; Chan, I.S.F.; Chen, J.; Gesser, R.; Moeller, E.;  
398 Ritter, M.; Vuocolo, S.; Luxembourg, A.; Broad Spectrum HPV Vaccine Study. A 9-valent HPV vaccine  
399 against infection and intraepithelial neoplasia in women. *N Engl J Med* **2015**, *372*, 711–23.
- 400 56. Draper, E.; Bissett, S.L.; Howell-Jones, R.; Edwards, D.; Munslow, G.; Soldan, K.; Beddows, S. Neutralization  
401 of non-vaccine human papillomavirus pseudoviruses from the A7 and A9 species groups by bivalent HPV  
402 vaccine sera. *Vaccine* **2011**, *29*, 8585–8590.
- 403 57. Kemp, T.J.; Hildesheim, A.; Safaeian, M.; Dauner, J.G.; Pan, Y.; Porras, C.; Schiller, J.T.; Lowy, D.R.;  
404 Herrero, R.; Pinto, L.A. HPV16/18 L1 VLP vaccine induces cross-neutralizing antibodies that may mediate  
405 cross-protection. *Vaccine* **2011**, *29*, 2011–2014.
- 406 58. Markowitz, L.E.; Liu, G.; Hariri, S.; Steinau, M.; Dunne, E.F.; Unger, E.R. Prevalence of HPV After  
407 Introduction of the Vaccination Program in the United States. *Pediatrics* **2016**, *137*, e20151968.
- 408 59. Worobey, M.; Han, G.Z.; Rambaut, A. A synchronized global sweep of the internal genes of modern avian  
409 influenza virus. *Nature* **2014**, *508*, 254–7.
- 410 60. Weinert, L.A.; Depledge, D.P.; Kundu, S.; Gershon, A.A.; Nichols, R.A.; Balloux, F.; Welch, J.J.; Breuer,  
411 J. Rates of Vaccine Evolution Show Strong Effects of Latency: Implications for Varicella Zoster Virus  
412 Epidemiology. *Mol Biol Evol* **2015**, *32*, 1020–1028.
- 413 61. da Fonseca, D.M.; Hand, T.W.; Han, S.J.; Gerner, M.Y.; Glatman Zaretsky, A.; Byrd, A.L.; Harrison, O.J.;  
414 Ortiz, A.M.; Quinones, M.; Trinchieri, G.; Brenchley, J.M.; Brodsky, I.E.; Germain, R.N.; Randolph, G.J.;  
415 Belkaid, Y. Microbiota-Dependent Sequelae of Acute Infection Compromise Tissue-Specific Immunity. *Cell*  
416 **2015**, *163*, 354–66.
- 417 62. Paschos, K.; Allday, M.J. Epigenetic reprogramming of host genes in viral and microbial pathogenesis.  
418 *Trends Microbiol* **2010**, *18*, 439–47.
- 419 63. Hattori, N.; Ushijima, T. Epigenetic impact of infection on carcinogenesis: mechanisms and applications.  
420 *Genome Medicine* **2016**, *8*, 10.
- 421 64. Johannsen, E.; Lambert, P.F. Epigenetics of human papillomaviruses. *Virology* **2013**, *445*, 205–212.

422 © 2017 by the authors. Submitted to *Viruses* for possible open access publication under the terms and conditions  
423 of the Creative Commons Attribution (CC BY) license (<http://creativecommons.org/licenses/by/4.0/>).
